# Supplementary material
Source: PubMed Central journal article supplement (PMC3001847)
Supplement: supp_dkq387_dkq387supp.pdf [file supp_dkq387_dkq387supp.pdf]

## Supplementary data

Figure S1. Alignment of passage 31 wt, DS and DW IFV B/Maryland/1/59 HA sequences.

### B/Maryland/1/59 HA amino acid alignment: parental strain and passage 31 wt, DS, and DW

S136T in DS and DW

G137R in DS and DW

V155I in DS

```
DS      ----YLLMVVTSNADRICTGITSSNSPHVVKATATQGEVNVTVGVIPLTPTTKSHFANLKG 56
DW      -XLIVLLMVVTSNADRICTGITSSNSPHVVKATATQGEVNVTVGVIPLTPTTKSHFANLKG 56
WT      XXIIIVLLMVVTSNADRICTGITSSNSPHVVKATATQGEVNVTVGVIPLTPTTKSHFANLKG 56
Parental -----XVTSNADRICTGITSSNSPHVVKATATQGEVNVTVGVIPLTPTTKSHFANLKG 56
          *****

DS      TQTRGKLCPNCLNCTDLVALGRPKCMGTIPSAKVSILHEVKPVTSGCFPIMHDRTKIRQ 110
DW      TQTRGKLCPNCLNCTDLVALGRPKCMGTIPSAKVSILHEVKPVTSGCFPIMHDRTKIRQ 110
WT      TQTRGKLCPNCLNCTDLVALGRPKCMGTIPSAKVSILHEVKPVTSGCFPIMHDRTKIRQ 110
Parental TQTRGKLCPNCLNCTDLVALGRPKCMGTIPSAKVSILHEVKPVTSGCFPIMHDRTKIRQ 110
          *****

DS      LPNLLRGYENIRLSTRNVINAETAPGGPYTVGTRSCPNVTVNGKGFETMAWAIPKKNK 159
DW      LPNLLRGYENIRLSTRNVINAETAPGGPYTVGTRSCPNVTVNGKGFETMAWAIPKKNK 159
WT      LPNLLRGYENIRLSTRNVINAETAPGGPYTVGTRSCPNVTVNGKGFETMAWAIPKKNK 159
Parental LPNLLRGYENIRLSTRNVINAETAPGGPYTVGTRSCPNVTVNGKGFETMAWAIPKKNK 159
          *****

DS      TATNPLIVEVPYICTKGEDQITVWGFHSDDETQMVILYGDSKPKQFTSSANGVITHYVSQ 216
DW      TATNPLIVEVPYICTKGEDQITVWGFHSDDETQMVILYGDSKPKQFTSSANGVITHYVSQ 216
WT      TATNPLIVEVPYICTKGEDQITVWGFHSDDETQMVILYGDSKPKQFTSSANGVITHYVSQ 216
Parental TATNPLIVEVPYICTKGEDQITVWGFHSDDETQMVILYGDSKPKQFTSSANGVITHYVSQ 216
          *****

DS      IGGFPNQTETEGLKQSGRIVVDYIVQKPGKGTGTIVYQRGVLLPQKVVWCASGRSKVIKGS 272
DW      IGGFPNQTETEGLKQSGRIVVDYIVQKPGKGTGTIVYQRGVLLPQKVVWCASGRSKVIKGS 272
WT      IGGFPNQTETEGLKQSGRIVVDYIVQKPGKGTGTIVYQRGVLLPQKVVWCASGRSKVIKGS 272
Parental IGGFPNQTETEGLKQSGRIVVDYIVQKPGKGTGTIVYQRGVLLPQKVVWCASGRSKVIKGS 272
          *****

DS      PLIGEADCLHEKYGGLNKSHPYTTGEHAKAIGNCPIWVKTPKLANGTKYRPPAKLLKER 329
DW      PLIGEADCLHEKYGGLNKSHPYTTGEHAKAIGNCPIWVKTPKLANGTKYRPPAKLLKER 329
WT      PLIGEADCLHEKYGGLNKSHPYTTGEHAKAIGNCPIWVKTPKLANGTKYRPPAKLLKER 329
Parental PLIGEADCLHEKYGGLNKSHPYTTGEHAKAIGNCPIWVKTPKLANGTKYRPPAKLLKER 329
          *****

DS      GFFGAIAGFLEGGWEGMIAGWHGYTSHGAHGVAVAADLKSTQEAINKITKNLNSLSELEV 389
DW      GFFGAIAGFLEGGWEGMIAGWHGYTSHGAHGVAVAADLKSTQEAINKITKNLNSLSELEV 389
WT      GFFGAIAGFLEGGWEGMIAGWHGYTSHGAHGVAVAADLKSTQEAINKITKNLNSLSELEV 389
Parental GFFGAIAGFLEGGWEGMIAGWHGYTSHGAHGVAVAADLKSTQEAINKITKNLNSLSELEV 389
          *****

DS      KNLQRLSGAMDELHNEILELDEKVDLDRADTISSQIELAVLLSNEGIINSEDEHLLALER 449
DW      KNLQRLSGAMDELHNEILELDEKVDLDRADTISSQIELAVLLSNEGIINSEDEHLLALER 449
WT      KNLQRLSGAMDELHNEILELDEKVDLDRADTISSQIELAVLLSNEGIINSEDEHLLALER 449
Parental KNLQRLSGAMDELHNEILELDEKVDLDRADTISSQIELAVLLSNEGIINSEDEHLLALER 449
          *****

DS      KLKKMLGPSAIDIGNGCFETKHKCNQTCLDRIAAGTFNAGEFSLPTFDSLNIITAASLNDD 509
DW      KLKKMLGPSAIDIGNGCFETKHKCNQTCLDRIAAGTFNAGEFSLPTFDSLNIITAASLNDD 509
WT      KLKKMLGPSAIDIGNGCFETKHKCNQTCLDRIAAGTFNAGEFSLPTFDSLNIITAASLNDD 509
Parental KLKKMLGPSAIDIGNGCFETKHKCNQTCLDRIAAGTFNAGEFSLPTFDSLNIITAASLNDD 509
          *****

DS      GLDNHTILLYYSTAASSLAVILMIAIFIVYMVSRDNVSCSICL 550
DW      GLDNHTILLYYSTAASSLAVILMIAIFIVYMVSRDNVSCSICL 550
WT      GLDNHTILLYYSTAASSLAVILMIAIFIVYMVSRDNVSCSICL 550
Parental GLDNHTILLYYSTAASSLAVILMIAIFIVYMVSRDNVSCSICL 550
          *****
```

**Figure S2.** Alignment of passage 31 wt, DS and DW IFV B/Maryland/1/59 NA sequences.

**B/Maryland/1/59 NA amino acid alignment:  
parental strain and passage 31 wt, DS, and DW**

```

S386G in wt
D387G in wt
M467V in wt
L38P in DS
A268I in DW
W438L in DS and DW

DS      -----VLLSLYVSASLSYLLYSDIILKFSPTKITAPTMSLECVNVSNAQAVN 63
DW      -----VLLSLYVSASLSYLLYSDIILKFSPTKITAPTMSLECVNVSNAQAVN 63
Parental TIQTLTLFLTSGGVLLSLYVSASLSYLLYSDIILKFSPTKITAPTMSLECVNVSNAQAVN 63
WT      TIQTLTLFLTSGGVLLSLYVSASLSYLLYSDIILKFSPTKITAPTMSLECVNVSNAQAVN 63
*****

DS      HSATKEMTFLLPEPEWYPRLSCQGSTFQKALLISPHRFGETRGNAPLIIREPFVACGP 126
DW      HSATKEMTFLLPEPEWYPRLSCQGSTFQKALLISPHRFGETRGNAPLIIREPFVACGP 126
Parental HSATKEMTFLLPEPEWYPRLSCQGSTFQKALLISPHRFGETRGNAPLIIREPFVACGP 126
WT      HSATKEMTFLLPEPEWYPRLSCQGSTFQKALLISPHRFGETRGNAPLIIREPFVACGP 126
*****

DS      KECRFHALTHYAAQPGGYNGTRKDRNKLRLHLSVKLGKIPTVENSIFHMAAWSGSACHD 185
DW      KECRFHALTHYAAQPGGYNGTRKDRNKLRLHLSVKLGKIPTVENSIFHMAAWSGSACHD 185
Parental KECRFHALTHYAAQPGGYNGTRKDRNKLRLHLSVKLGKIPTVENSIFHMAAWSGSACHD 185
WT      KECRFHALTHYAAQPGGYNGTRKDRNKLRLHLSVKLGKIPTVENSIFHMAAWSGSACHD 185
*****

DS      GREWTYIGVDGPDSDALIKIKYGEAYTDYHSYAHNLRQTQESACNCIGGDCYLMITDGS 245
DW      GREWTYIGVDGPDSDALIKIKYGEAYTDYHSYAHNLRQTQESACNCIGGDCYLMITDGS 245
Parental GREWTYIGVDGPDSDALIKIKYGEAYTDYHSYAHNLRQTQESACNCIGGDCYLMITDGS 245
WT      GREWTYIGVDGPDSDALIKIKYGEAYTDYHSYAHNLRQTQESACNCIGGDCYLMITDGS 245
*****

DS      ASGISKCRFLKIREGRIIKEIFPAGRVEHTEECTCGFASNKTIECACRDNSYAKRPFVK 304
DW      ASGISKCRFLKIREGRIIKEIFPAGRVEHTEECTCGFASNKTIECACRDNSYAKRPFVK 304
Parental ASGISKCRFLKIREGRIIKEIFPAGRVEHTEECTCGFASNKTIECACRDNSYAKRPFVK 304
WT      ASGISKCRFLKIREGRIIKEIFPAGRVEHTEECTCGFASNKTIECACRDNSYAKRPFVK 304
*****

DS      LNVETDAEIRLMCTETYLDTPRPDDGSITGPCESNGDKLGGIKGGFVHQRMASKIGRW 361
DW      LNVETDAEIRLMCTETYLDTPRPDDGSITGPCESNGDKLGGIKGGFVHQRMASKIGRW 361
Parental LNVETDAEIRLMCTETYLDTPRPDDGSITGPCESNGDKLGGIKGGFVHQRMASKIGRW 361
WT      LNVETDAEIRLMCTETYLDTPRPDDGSITGPCESNGDKLGGIKGGFVHQRMASKIGRW 361
*****

DS      YSRTMSKTERMGMELYVKYDGDPTDSDALAPSGVMVSMKEPGWYSFGFEIKDKKCDVPC 421
DW      YSRTMSKTERMGMELYVKYDGDPTDSDALAPSGVMVSMKEPGWYSFGFEIKDKKCDVPC 421
Parental YSRTMSKTERMGMELYVKYDGDPTDSDALAPSGVMVSMKEPGWYSFGFEIKDKKCDVPC 421
WT      YSRTMSKTERMGMELYVKYDGDPTDSDALAPSGVMVSMKEPGWYSFGFEIKDKKCDVPC 421
*****

DS      IGIEMVHDGGKETLHSAATAIYCLMGSGQLLWDIVTGVDMAL 469
DW      IGIEMVHDGGKETLHSAATAIYCLMGSGQLLWDIVTGVDMAL 469
Parental IGIEMVHDGGKETLHSAATAIYCLMGSGQLLWDIVTGVDMAL 469
WT      IGIEMVHDGGKETLHSAATAIYCLMGSGQLLWDIVTGVDMAL 469
*****

```



Figure S3. Alignment of passage 26 wt, DS and DW IFV A/Victoria/3/75 HA sequences.

## A/Victoria/3/75 HA amino acid alignment: parental strain and passage 26 wt, DS, and DW

|                    |                                                               |     |
|--------------------|---------------------------------------------------------------|-----|
| T10I in wt         |                                                               |     |
| S186I in DS and DW |                                                               |     |
| N248S in DW        |                                                               |     |
| DS                 | XXTIIALSIFCLVFAQDLPGNDNNSTATLCLGHHAVPNGTLVKTITNDQIEVTNAT      | 40  |
| DW                 | MKTIIALSIFCLVFAQDLPGNDNNSTATLCLGHHAVPNGTLVKTITNDQIEVTNAT      | 40  |
| Parental           | XXTIIALSIFCLVFAQDLPGNDNNSTATLCLGHHAVPNGTLVKTITNDQIEVTNAT      | 40  |
| WT                 | XXTIIKLSYIFCLVFAQDLPGNDNNSTATLCLGHHAVPNGTLVKTITNDQIEVTNAT     | 40  |
|                    | ***                                                           |     |
| DS                 | ELVQSSSTGKICNNPHRILDGINCTLIDALLGDPHCDGFQNEKWDLFVERSKAFSNCYPY  | 100 |
| DW                 | ELVQSSSTGKICNNPHRILDGINCTLIDALLGDPHCDGFQNEKWDLFVERSKAFSNCYPY  | 100 |
| Parental           | ELVQSSSTGKICNNPHRILDGINCTLIDALLGDPHCDGFQNEKWDLFVERSKAFSNCYPY  | 100 |
| WT                 | ELVQSSSTGKICNNPHRILDGINCTLIDALLGDPHCDGFQNEKWDLFVERSKAFSNCYPY  | 100 |
|                    | *****                                                         |     |
| DS                 | DVPDYASLRSLVASSGTLEFINEGFNWTGVTQNGGSNACKRGPDIGFFSRLNWLKSGST   | 160 |
| DW                 | DVPDYASLRSLVASSGTLEFINEGFNWTGVTQNGGSNACKRGPDIGFFSRLNWLKSGST   | 160 |
| Parental           | DVPDYASLRSLVASSGTLEFINEGFNWTGVTQNGGSNACKRGPDIGFFSRLNWLKSGST   | 160 |
| WT                 | DVPDYASLRSLVASSGTLEFINEGFNWTGVTQNGGSNACKRGPDIGFFSRLNWLKSGST   | 160 |
|                    | *****                                                         |     |
| DS                 | YPVQNVTMPNNDNSDKLYIWGVHHPITDKEQTDLYVQASGKVTVSTKRSQQTIIIPNVGSR | 220 |
| DW                 | YPVQNVTMPNNDNSDKLYIWGVHHPITDKEQTDLYVQASGKVTVSTKRSQQTIIIPNVGSR | 220 |
| Parental           | YPVQNVTMPNNDNSDKLYIWGVHHPITDKEQTDLYVQASGKVTVSTKRSQQTIIIPNVGSR | 220 |
| WT                 | YPVQNVTMPNNDNSDKLYIWGVHHPITDKEQTDLYVQASGKVTVSTKRSQQTIIIPNVGSR | 220 |
|                    | *****                                                         |     |
| DS                 | PWVRGLSSRISYWTIVKPGDILVINSNGLIAPRGYFKMRTGKSSIMRSDAPIGTCSSE    | 280 |
| DW                 | PWVRGLSSRISYWTIVKPGDILVINSNGLIAPRGYFKMRTGKSSIMRSDAPIGTCSSE    | 280 |
| Parental           | PWVRGLSSRISYWTIVKPGDILVINSNGLIAPRGYFKMRTGKSSIMRSDAPIGTCSSE    | 280 |
| WT                 | PWVRGLSSRISYWTIVKPGDILVINSNGLIAPRGYFKMRTGKSSIMRSDAPIGTCSSE    | 280 |
|                    | *****                                                         |     |
| DS                 | CITPNGSIPNDKPFQNVNKITYGACPKYVKQNTLKLATGMRNVPEKQTRGIFGAIAGFIE  | 340 |
| DW                 | CITPNGSIPNDKPFQNVNKITYGACPKYVKQNTLKLATGMRNVPEKQTRGIFGAIAGFIE  | 340 |
| Parental           | CITPNGSIPNDKPFQNVNKITYGACPKYVKQNTLKLATGMRNVPEKQTRGIFGAIAGFIE  | 340 |
| WT                 | CITPNGSIPNDKPFQNVNKITYGACPKYVKQNTLKLATGMRNVPEKQTRGIFGAIAGFIE  | 340 |
|                    | *****                                                         |     |
| DS                 | NGWEGMIDGWYGFRHQNSEGTQQAADLKSTQAAIDQINGKLNRVIEKTNEKFHQIEKEFS  | 400 |
| DW                 | NGWEGMIDGWYGFRHQNSEGTQQAADLKSTQAAIDQINGKLNRVIEKTNEKFHQIEKEFS  | 400 |
| Parental           | NGWEGMIDGWYGFRHQNSEGTQQAADLKSTQAAIDQINGKLNRVIEKTNEKFHQIEKEFS  | 400 |
| WT                 | NGWEGMIDGWYGFRHQNSEGTQQAADLKSTQAAIDQINGKLNRVIEKTNEKFHQIEKEFS  | 400 |
|                    | *****                                                         |     |
| DS                 | EVEGRIQDLEKYVEDTKIDLWSYNAELLVALENQHTIDLTDSEMKNLFEKTRRQLRENAE  | 460 |
| DW                 | EVEGRIQDLEKYVEDTKIDLWSYNAELLVALENQHTIDLTDSEMKNLFEKTRRQLRENAE  | 460 |
| Parental           | EVEGRIQDLEKYVEDTKIDLWSYNAELLVALENQHTIDLTDSEMKNLFEKTRRQLRENAE  | 460 |
| WT                 | EVEGRIQDLEKYVEDTKIDLWSYNAELLVALENQHTIDLTDSEMKNLFEKTRRQLRENAE  | 460 |
|                    | *****                                                         |     |
| DS                 | DMGNGCFKIYHKCDNACIGSIRNGTYDHDVYRDEALNNRFQIKGVELKSGYKDWILWISF  | 520 |
| DW                 | DMGNGCFKIYHKCDNACIGSIRNGTYDHDVYRDEALNNRFQIKGVELKSGYKDWILWISF  | 520 |
| Parental           | DMGNGCFKIYHKCDNACIGSIRNGTYDHDVYRDEALNNRFQIKGVELKSGYKDWILWISF  | 520 |
| WT                 | DMGNGCFKIYHKCDNACIGSIRNGTYDHDVYRDEALNNRFQIKGVELKSGYKDWILWISF  | 520 |
|                    | *****                                                         |     |
| DS                 | AISCFLLCVLLGFIMWACQKGNIRCNICI                                 | 550 |
| DW                 | AISCFLLCVLLGFIMWACQKGNIRCNICI                                 | 550 |
| Parental           | AISCFLLCVLLGFIMWACQKGNIRCNICI                                 | 550 |
| WT                 | AISCFLLCVLLGFIMWACQKGNIRCXXXX                                 | 550 |
|                    | *****                                                         |     |

**Figure S4.** Alignment of passage 26 wt, DS and DW IFV A/Victoria/3/75 NA sequences.

## **A/Victoria/3/75 NA amino acid alignment: parental strain and passage 26 wt, DS, and DW**

```
Parental  -----KIITIGSVSLTIATICFLMQIAILVTTVTLHFKQYECDSPANNQVMPCEPIIIE 59
DS        -----XXITIGSVSLTIATICFLMQIAILVTTVTLHFKQYECDSPANNQVMPCEPIIIE 59
DW        -----XXXXXXSVSLTIATICFLMQIAILVTTVTLHFKQYECDSPANNQVMPCEPIIIE 59
WT        -----XXXXXXXXXXATICFLMQIAILVTTVTLHFKQYECDSPANNQVMPCEPIIIE 59
          *****

Parental  RNITEIVYLTNNTTIEKEICPKLVEYRNWSKPQCKITGFAPFSKDNSIRLSAGGDIWVIRE 119
DS        RNITEIVYLTNNTTIEKEICPKLVEYRNWSKPQCKITGFAPFSKDNSIRLSAGGDIWVIRE 119
DW        RNITEIVYLTNNTTIEKEICPKLVEYRNWSKPQCKITGFAPFSKDNSIRLSAGGDIWVIRE 119
WT        RNITEIVYLTNNTTIEKEICPKLVEYRNWSKPQCKITGFAPFSKDNSIRLSAGGDIWVIRE 119
          *****

Parental  PYVSCDPGKCYQFALGQGTTLNKHNSNDTIHDRTPHRILLMNELGVPFHLGTRQVCIAWS 179
DS        PYVSCDPGKCYQFALGQGTTLNKHNSNDTIHDRTPHRILLMNELGVPFHLGTRQVCIAWS 179
DW        PYVSCDPGKCYQFALGQGTTLNKHNSNDTIHDRTPHRILLMNELGVPFHLGTRQVCIAWS 179
WT        PYVSCDPGKCYQFALGQGTTLNKHNSNDTIHDRTPHRILLMNELGVPFHLGTRQVCIAWS 179
          *****

Parental  SSSCHDGGKAWLHVCVTGYDKNATASFIYDGKLVDSIGSWSQNILRTQESECVCINGTCTV 239
DS        SSSCHDGGKAWLHVCVTGYDKNATASFIYDGKLVDSIGSWSQNILRTQESECVCINGTCTV 239
DW        SSSCHDGGKAWLHVCVTGYDKNATASFIYDGKLVDSIGSWSQNILRTQESECVCINGTCTV 239
WT        SSSCHDGGKAWLHVCVTGYDKNATASFIYDGKLVDSIGSWSQNILRTQESECVCINGTCTV 239
          *****

Parental  VMTDGSASGRADTKILFIEEGKIVHISPLSGSAQHVEECSCYPRYPGVRCICRDNWKGSN 299
DS        VMTDGSASGRADTKILFIEEGKIVHISPLSGSAQHVEECSCYPRYPGVRCICRDNWKGSN 299
DW        VMTDGSASGRADTKILFIEEGKIVHISPLSGSAQHVEECSCYPRYPGVRCICRDNWKGSN 299
WT        VMTDGSASGRADTKILFIEEGKIVHISPLSGSAQHVEECSCYPRYPGVRCICRDNWKGSN 299
          *****

Parental  RPVVDINVKDYSIDSSYVCSGLVGDTPRKNDRSSSSYCRPNPNEKGNHGKGVKGFDDGND 359
DS        RPVVDINVKDYSIDSSYVCSGLVGDTPRKNDRSSSSYCRPNPNEKGNHGKGVKGFDDGND 359
DW        RPVVDINVKDYSIDSSYVCSGLVGDTPRKNDRSSSSYCRPNPNEKGNHGKGVKGFDDGND 359
WT        RPVVDINVKDYSIDSSYVCSGLVGDTPRKNDRSSSSYCRPNPNEKGNHGKGVKGFDDGND 359
          *****

Parental  VWMGRTI SEDSRSGYETFVKVIGGWSTPNSKLQINRQVIVDSANRSGYSGIFSV EGGKSCIN 419
DS        VWMGRTI SEDSRSGYETFVKVIGGWSTPNSKLQINRQVIVDSANRSGYSGIFSV EGGKSCIN 419
DW        VWMGRTI SEDSRSGYETFVKVIGGWSTPNSKLQINRQVIVDSANRSGYSGIFSV EGGKSCIN 419
WT        VWMGRTI SEDSRSGYETFVKVIGGWSTPNSKLQINRQVIVDSANRSGYSGIFSV EGGKSCIN 419
          *****

Parental  RCFYVELIRGREQETRVWWTNSNSIVVFCGTSGTGTGSGWPDGADINLMPI 469
DS        RCFYVELIRGREQETRVWWTNSNSIVVFCGTSGTGTGSGWPDGADINLMPI 469
DW        RCFYVELIRGREQETRVWWTNSNSIVVFCGTSGTGTGSGWPDGAXXXXXX 469
WT        RCFYVELIRGREQETRVWWTNSNSIVVFCGTSGTGTGSGWPDGADIXXXXX 469
          *****
```



**Figure S5.** DS IFV in plaque assay. Confluent monolayers of MDCK cells were infected with wt and DS IFVs and overlaid with 1:1 agar/medium to create plaques. Indicated viruses were applied to each well at equivalent pfu (150 pfu/well) and DAS181 was included in the agar/medium solution. Increasing concentrations of DAS181 were used (from upper left-hand corner of each plate going clockwise: 0, 0.0015, 0.015, 0.15, 1.5 and 15  $\mu$ M).

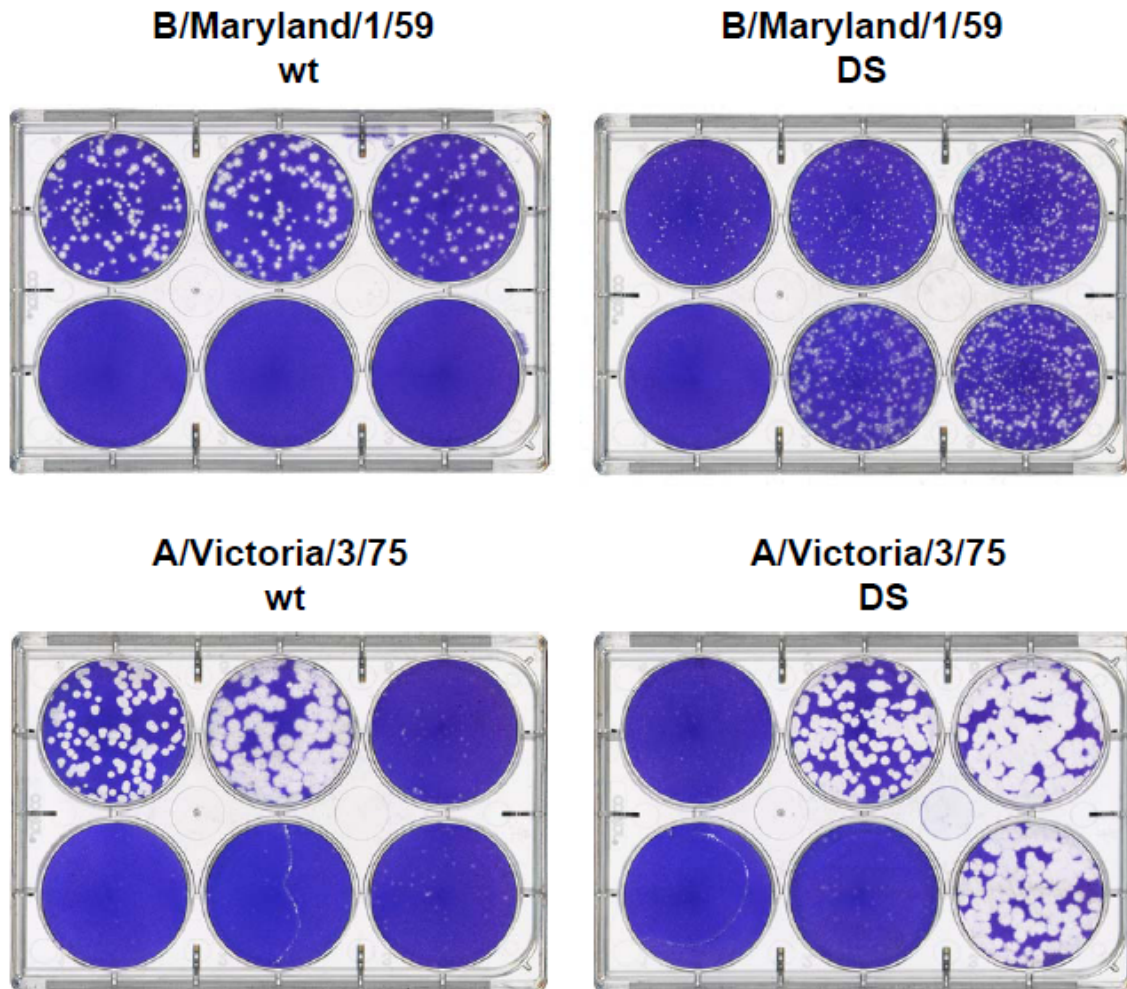

**Table S1.** HA and NA mutations identified during IFV B/Maryland/1/59 passaging

| Passage # | HA mutations |                 |                                                       | NA mutations                               |                                           |                                  |
|-----------|--------------|-----------------|-------------------------------------------------------|--------------------------------------------|-------------------------------------------|----------------------------------|
|           | wt           | DS              | DW                                                    | wt                                         | DS                                        | DW                               |
| 4         | –            | –               |                                                       | –                                          | –                                         |                                  |
| 5         | –            | G137R           |                                                       | –                                          | –                                         |                                  |
| 6         | –            | G137R           |                                                       | –                                          | –                                         |                                  |
| 7         | –            | G137R           |                                                       | –                                          | –                                         |                                  |
| 8         | –            | G137R           |                                                       | –                                          | –                                         |                                  |
| 12        | –            | G137R           |                                                       | –                                          | –                                         |                                  |
| 13        | –            | G137R,<br>S136T |                                                       | –                                          | –                                         |                                  |
| 14        | –            | G137R,<br>S136T |                                                       | –                                          | –                                         |                                  |
| 18        | –            | G137R,<br>S136T |                                                       | –                                          | W438L                                     |                                  |
| 19        | –            | G137R,<br>S136T | G137R,<br>S136T                                       | –                                          | W438L                                     | W438L                            |
| 22        | V247M        | G137R,<br>S136T | G137R,<br>S136T,<br>deletions <sup>a</sup>            | S386G <sup>a</sup> ,<br>D387G <sup>a</sup> | W438L                                     | W438L,<br>deletions <sup>a</sup> |
| 23        | V247M        | G137R,<br>S136T | G137R,<br>S136T,<br>deletions <sup>a</sup> ,<br>V155I | S386G <sup>a</sup> ,<br>D387G <sup>a</sup> | W438L                                     | W438L,<br>deletions <sup>a</sup> |
| 27        | V247M        | G137R,<br>S136T | G137R,<br>S136T,<br>V155I                             | S386G <sup>a</sup> ,<br>D387G <sup>a</sup> | W438L <sup>a</sup> ,<br>L38P <sup>a</sup> | W438L,<br>A268T <sup>a</sup>     |
| 29        | –            | G137R,<br>S136T | G137R,<br>S136T,<br>V155I                             | S386G <sup>a</sup> ,<br>D387G <sup>a</sup> | W438L <sup>a</sup> ,<br>L38P <sup>a</sup> | W438L,<br>A268T                  |
| 34        | –            | G137R,<br>S136T | G137R,<br>S136T,<br>V155I                             | S386G <sup>a</sup> ,<br>D387G <sup>a</sup> | W438L <sup>a</sup> ,<br>L38P <sup>a</sup> | W438L,<br>A268T                  |

–, No mutations observed.

<sup>a</sup>Sequence heterogeneity observed for this amino acid.

HA and NA sequences from wt, DS and DW IFV B/Maryland/1/59 were compared with initial viral stock sequence at most passages.

Mutations observed at select/representative passages are shown.

B/Maryland/1/59 DW virus was initiated at passage 17 and is thus only described beyond this point.

Sequence data noted with H3 and N2 numbering schemes, as previously described.<sup>21,22</sup>

Full sequence alignments are shown in Figures S1 and S2.

**Table S2.** HA and NA mutations identified during IFV A/Victoria/3/75 passaging

| Passage # | HA mutations      |                 |                                                     | NA mutations |       |                    |
|-----------|-------------------|-----------------|-----------------------------------------------------|--------------|-------|--------------------|
|           | wt                | DS              | DW                                                  | wt           | DS    | DW                 |
| 1         | –                 | –               |                                                     | –            | –     |                    |
| 2         | –                 | –               |                                                     | –            | –     |                    |
| 3         | –                 | –               |                                                     | –            | –     |                    |
| 4         | –                 | N126T,<br>E325K |                                                     | –            | –     |                    |
| 5         | –                 | N126T           |                                                     | –            | –     |                    |
| 6         | –                 | S186I           |                                                     | –            | –     |                    |
| 12        | –                 | S186I           |                                                     | –            | –     |                    |
| 14        | –                 | S186I           |                                                     | –            | K210R |                    |
| 15        | –                 | S186I           | S186I                                               | –            | –     | K210R <sup>a</sup> |
| 17        | T10I <sup>a</sup> | S186I           | S186I,<br>K68R <sup>b</sup>                         | –            | –     | K210R <sup>a</sup> |
| 19        | T10I              | S186I           | S186I,<br>K68R <sup>b</sup> ,<br>N248S <sup>a</sup> | –            | –     | K210R <sup>a</sup> |
| 21        | T10I              | S186I           | S186I,<br>K68R <sup>b</sup> ,<br>N248S              | –            | –     | –                  |
| 24        | T10I              | S186I           | S186I,<br>N248S                                     | –            | –     | –                  |
| 26        | T10I              | S186I           | S186I,<br>N248S                                     | –            | –     | –                  |

–, No mutations observed.

<sup>a</sup>Sequence heterogeneity observed for this amino acid.

<sup>b</sup>Mutation lies in HA2 segment, all others in HA1 segment.

HA and NA sequences from wt, DS and DW IFV A/Victoria/3/75 were compared with initial viral stock sequence at most passages.

Mutations observed at select/representative passages are shown.

AVictoria/3/75 DW virus was initiated at passage 14 and is thus only described beyond this point.

Sequence data noted with H3 and N2 numbering schemes, as previously described.<sup>21,22</sup>

Full sequence alignments are shown in Figures S3 and S4.

**Table S3.** Top 20 sialylated glycan structures bound on microarray by wt and DS IFV

B/Maryland/1/59

| Glycan #           | Glycan structure                                                                                                                                                                                    | RFU   |
|--------------------|-----------------------------------------------------------------------------------------------------------------------------------------------------------------------------------------------------|-------|
| B/Maryland/1/59/wt |                                                                                                                                                                                                     |       |
| 361                | Neu5Ac $\alpha$ 2-6GlcNAc $\beta$ 1-4GlcNAc-Sp21                                                                                                                                                    | 30797 |
| 362                | Neu5Ac $\alpha$ 2-6GlcNAc $\beta$ 1-4GlcNAc $\beta$ 1-4GlcNAc-Sp21                                                                                                                                  | 16440 |
| 318                | Neu5Ac $\alpha$ 2-6Gal $\beta$ 1-4GlcNAc $\beta$ 1-2Man $\alpha$ 1-3(Neu5Ac $\alpha$ 2-6Gal $\beta$ 1-4GlcNAc $\beta$ 1-2Man $\alpha$ 1-6)Man $\beta$ 1-4GlcNAc $\beta$ 1-4GlcNAc $\beta$ -N(LT)AVL | 3385  |
| 326                | Neu5Ac $\alpha$ 2-6Gal $\beta$ 1-4GlcNAc $\beta$ 1-3Gal $\beta$ 1-4GlcNAc $\beta$ 1-3Gal $\beta$ 1-4GlcNAc $\beta$ -Sp0                                                                             | 2157  |
| 244                | Neu5Ac $\alpha$ 2-6Gal $\beta$ 1-4GlcNAc $\beta$ -Sp8                                                                                                                                               | 1988  |
| 246                | Neu5Ac $\alpha$ 2-6Gal $\beta$ 1-4GlcNAc $\beta$ 1-3Gal $\beta$ 1-4GlcNAc $\beta$ -Sp0                                                                                                              | 1836  |
| 324                | Neu5Ac $\alpha$ 2-6Gal $\beta$ 1-4GlcNAc $\beta$ 1-3Gal $\beta$ 1-3GlcNAc $\beta$ -Sp0                                                                                                              | 1300  |
| 242                | Neu5Ac $\alpha$ 2-6Gal $\beta$ 1-4[6OSO3]GlcNAc $\beta$ -Sp8                                                                                                                                        | 1032  |
| 198                | Neu5Ac $\alpha$ 2-6Gal $\beta$ 1-4GlcNAc $\beta$ 1-2Man $\alpha$ 1-3(Neu5Ac $\alpha$ 2-3Gal $\beta$ 1-4GlcNAc $\beta$ 1-2Man $\alpha$ 1-6)Man $\beta$ 1-4GlcNAc $\beta$ 1-4GlcNAc $\beta$ -Sp12     | 912   |
| 214                | Neu5Ac $\alpha$ 2-3GalNAc $\beta$ 1-4GlcNAc $\beta$ -Sp0                                                                                                                                            | 901   |
| 340                | Neu5Ac $\alpha$ 2-6Gal $\beta$ 1-4GlcNAc $\beta$ 1-2Man $\alpha$ 1-3(Man $\alpha$ 1-6)Man $\beta$ 1-4GlcNAc $\beta$ 1-4GlcNAc-Sp12                                                                  | 880   |
| 241                | Neu5Ac $\alpha$ 2-6GalNAc $\beta$ 1-4GlcNAc $\beta$ -Sp0                                                                                                                                            | 839   |
| 315                | Neu5Ac $\alpha$ 2-3Gal $\beta$ 1-4GlcNAc $\beta$ 1-2Man $\alpha$ 1-3(Neu5Ac $\alpha$ 2-6Gal $\beta$ 1-4GlcNAc $\beta$ 1-2Man $\alpha$ 1-6)Man $\beta$ 1-4GlcNAc $\beta$ 1-4GlcNAc $\beta$ -Sp12     | 831   |
| 282                | Neu5Ac $\alpha$ 2-3Gal $\beta$ 1-4GlcNAc $\beta$ 1-3Gal $\beta$ 1-3GlcNAc $\beta$ -Sp0                                                                                                              | 803   |
| 237                | Neu5Ac $\alpha$ 2-3Gal $\beta$ 1-4GlcNAc $\beta$ 1-3Gal $\beta$ 1-4GlcNAc $\beta$ -Sp0                                                                                                              | 732   |
| 342                | Neu5Ac $\alpha$ 2-6Gal $\beta$ 1-4GlcNAc $\beta$ 1-2Man $\alpha$ 1-3Man $\beta$ 1-4GlcNAc $\beta$ 1-4GlcNAc-Sp12                                                                                    | 689   |
| 53                 | Neu5Ac $\alpha$ 2-6Gal $\beta$ 1-4GlcNAc $\beta$ 1-2Man $\alpha$ 1-3(Neu5Ac $\alpha$ 2-6Gal $\beta$ 1-4GlcNAc $\beta$ 1-2Man $\alpha$ 1-6)Man $\beta$ 1-4GlcNAc $\beta$ 1-4GlcNAc $\beta$ -Sp13     | 641   |
| 52                 | Neu5Ac $\alpha$ 2-6Gal $\beta$ 1-4GlcNAc $\beta$ 1-2Man $\alpha$ 1-3(Neu5Ac $\alpha$ 2-6Gal $\beta$ 1-4GlcNAc $\beta$ 1-2Man $\alpha$ 1-6)Man $\beta$ 1-4GlcNAc $\beta$ 1-4GlcNAc $\beta$ -Sp12     | 587   |
| 371                | NeuAc $\alpha$ 2-3Gal $\beta$ 1-4GlcNAc $\beta$ 1-3GalNAc-Sp14                                                                                                                                      | 528   |
| 243                | Neu5Ac $\alpha$ 2-6Gal $\beta$ 1-4GlcNAc $\beta$ -Sp0                                                                                                                                               | 512   |
| B/Maryland/1/59/DS |                                                                                                                                                                                                     |       |
| 315                | Neu5Ac $\alpha$ 2-3Gal $\beta$ 1-4GlcNAc $\beta$ 1-2Man $\alpha$ 1-3(Neu5Ac $\alpha$ 2-6Gal $\beta$ 1-4GlcNAc $\beta$ 1-2Man $\alpha$ 1-6)Man $\beta$ 1-4GlcNAc $\beta$ 1-4GlcNAc $\beta$ -Sp12     | 3700  |
| 214                | Neu5Ac $\alpha$ 2-3GalNAc $\beta$ 1-4GlcNAc $\beta$ -Sp0                                                                                                                                            | 3205  |
| 237                | Neu5Ac $\alpha$ 2-3Gal $\beta$ 1-4GlcNAc $\beta$ 1-3Gal $\beta$ 1-4GlcNAc $\beta$ -Sp0                                                                                                              | 3078  |
| 373                | Neu5Ac $\alpha$ 2-3Gal $\beta$ 1-4(Fuc $\alpha$ 1-3)GlcNAc $\beta$ 1-3GalNAc $\alpha$ -Sp14                                                                                                         | 2773  |
| 371                | NeuAc $\alpha$ 2-3Gal $\beta$ 1-4GlcNAc $\beta$ 1-3GalNAc-Sp14                                                                                                                                      | 2655  |
| 282                | Neu5Ac $\alpha$ 2-3Gal $\beta$ 1-4GlcNAc $\beta$ 1-3Gal $\beta$ 1-3GlcNAc $\beta$ -Sp0                                                                                                              | 2553  |
| 234                | Neu5Ac $\alpha$ 2-3Gal $\beta$ 1-4GlcNAc $\beta$ 1-3Gal $\beta$ 1-4GlcNAc $\beta$ 1-3Gal $\beta$ 1-4GlcNAc $\beta$ -Sp0                                                                             | 2552  |



|     |                                                                                                                                                                                                     |      |
|-----|-----------------------------------------------------------------------------------------------------------------------------------------------------------------------------------------------------|------|
| 142 | Neu5Ac $\alpha$ 2-3Gal $\beta$ 1-4GlcNAc $\beta$ 1-2Man $\alpha$ 1-3(Neu5Ac $\alpha$ 2-3Gal $\beta$ 1-4GlcNAc $\beta$ 1-2Man $\alpha$ 1-6)Man $\beta$ 1-4GlcNAc $\beta$ 1-4GlcNAc $\beta$ -Sp12     | 2442 |
| 236 | Neu5Ac $\alpha$ 2-3Gal $\beta$ 1-4GlcNAc $\beta$ -Sp8                                                                                                                                               | 2201 |
| 361 | Neu5Ac $\alpha$ 2-6GlcNAc $\beta$ 1-4GlcNAc-Sp21                                                                                                                                                    | 2016 |
| 312 | Neu5Ac $\alpha$ 2-3Gal $\beta$ 1-3(Neu5Ac $\alpha$ 2-3Gal $\beta$ 1-4GlcNAc $\beta$ 1-6)GalNAc $\alpha$ -Sp14                                                                                       | 1917 |
| 231 | Neu5Ac $\alpha$ 2-3Gal $\beta$ 1-4(Fuca1-3)GlcNAc $\beta$ 1-3Gal $\beta$ -Sp8                                                                                                                       | 1850 |
| 198 | Neu5Ac $\alpha$ 2-6Gal $\beta$ 1-4GlcNAc $\beta$ 1-2Man $\alpha$ 1-3(Neu5Ac $\alpha$ 2-3Gal $\beta$ 1-4GlcNAc $\beta$ 1-2Man $\alpha$ 1-6)Man $\beta$ 1-4GlcNAc $\beta$ 1-4GlcNAc $\beta$ -Sp12     | 1802 |
| 218 | Neu5Ac $\alpha$ 2-3Gal $\beta$ 1-3(Neu5Ac $\alpha$ 2-3Gal $\beta$ 1-4)GlcNAc $\beta$ -Sp8                                                                                                           | 1796 |
| 225 | Neu5Ac $\alpha$ 2-3Gal $\beta$ 1-3GlcNAc $\beta$ -Sp8                                                                                                                                               | 1787 |
| 318 | Neu5Ac $\alpha$ 2-6Gal $\beta$ 1-4GlcNAc $\beta$ 1-2Man $\alpha$ 1-3(Neu5Ac $\alpha$ 2-6Gal $\beta$ 1-4GlcNAc $\beta$ 1-2Man $\alpha$ 1-6)Man $\beta$ 1-4GlcNAc $\beta$ 1-4GlcNAc $\beta$ -N(LT)AVL | 1769 |
| 238 | Neu5Ac $\alpha$ 2-3Gal $\beta$ 1-4Glc $\beta$ -Sp0                                                                                                                                                  | 1698 |
| 235 | Neu5Ac $\alpha$ 2-3Gal $\beta$ 1-4GlcNAc $\beta$ -Sp0                                                                                                                                               | 1695 |
| 232 | Neu5Ac $\alpha$ 2-3Gal $\beta$ 1-4(Fuca1-3)GlcNAc $\beta$ 1-3Gal $\beta$ 1-4GlcNAc $\beta$ -Sp8                                                                                                     | 1662 |
| 224 | Neu5Ac $\alpha$ 2-3Gal $\beta$ 1-3GlcNAc $\beta$ -Sp0                                                                                                                                               | 1634 |

Information for the top 20 glycans bound by wt and DS IFV B/Maryland/1/59 (from graphs shown in Figure 9) is listed as the glycan number, the shorthand chemical name/structure and the RFU observed.
